# Supplementary material
Source: PubMed Central journal article supplement (PMC2867381)
Supplement: 00492.2009_1.pdf [file 00492.2009_1.pdf]

## Supplemental data 1

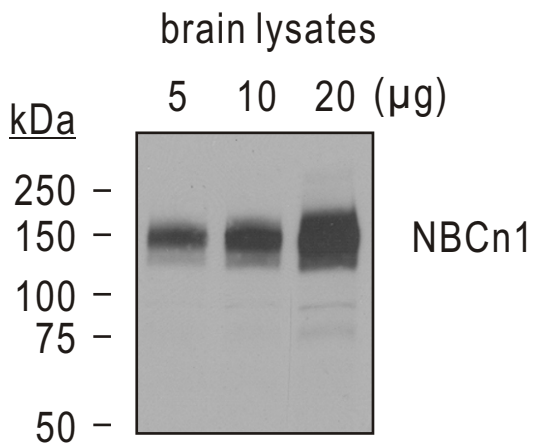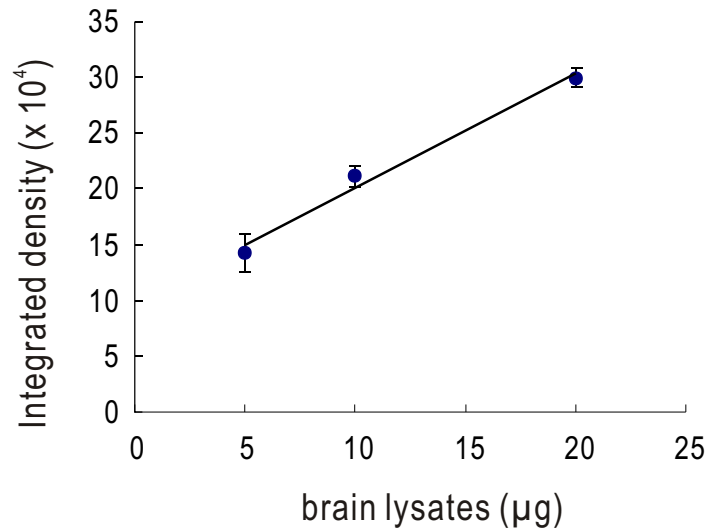

**Legend:** Calibration of NBCn1. A series of rat brain lysates were achieved using ImageJ software (NIH). The mean pixel intensity of NBCn1 was measured by positioning a box (2400 sq. pixel) around the protein band and subtracting background (n = 3).
